# Supplementary material for: Quality assessment of clinical practice guidelines for perioperative care and use of GRADE: a systematic review protocol
Source: PubMed Central journal article supplement — BMJ Open. 2021 Dec 14;11(12):e052795. doi: 10.1136/bmjopen-2021-052795 (PMC8671973; doi:10.1136/bmjopen-2021-052795), 2021-12-14
Supplement: bmjopen-2021-052795.draft_revisions.pdf [file bmjopen-2021-052795.draft_revisions.pdf]

# BMJ Open

BMJ Open is committed to open peer review. As part of this commitment we make the peer review history of every article we publish publicly available.

When an article is published we post the peer reviewers' comments and the authors' responses online. We also post the versions of the paper that were used during peer review. These are the versions that the peer review comments apply to.

The versions of the paper that follow are the versions that were submitted during the peer review process. They are not the versions of record or the final published versions. They should not be cited or distributed as the published version of this manuscript.

BMJ Open is an open access journal and the full, final, typeset and author-corrected version of record of the manuscript is available on our site with no access controls, subscription charges or pay-per-view fees (<http://bmjopen.bmj.com>).

If you have any questions on BMJ Open's open peer review process please email [info.bmjopen@bmj.com](mailto:info.bmjopen@bmj.com)

# BMJ Open

## Quality assessment of clinical practice guidelines for perioperative care and use of GRADE: a systematic review protocol

|                               |                                                                                                                                                                                                                                                                                                                                                                                                                                                                                                                                                                                                                                                                                                                                                                                                                                                                                                                                                                                                                                                                                                                                                                                                                                                                                                                                                                                                                                                                                                                                                                                                                                                                                                                                                                                                                                                                                                                                                                                                                                                                                                                                                                                                                                  |
|-------------------------------|----------------------------------------------------------------------------------------------------------------------------------------------------------------------------------------------------------------------------------------------------------------------------------------------------------------------------------------------------------------------------------------------------------------------------------------------------------------------------------------------------------------------------------------------------------------------------------------------------------------------------------------------------------------------------------------------------------------------------------------------------------------------------------------------------------------------------------------------------------------------------------------------------------------------------------------------------------------------------------------------------------------------------------------------------------------------------------------------------------------------------------------------------------------------------------------------------------------------------------------------------------------------------------------------------------------------------------------------------------------------------------------------------------------------------------------------------------------------------------------------------------------------------------------------------------------------------------------------------------------------------------------------------------------------------------------------------------------------------------------------------------------------------------------------------------------------------------------------------------------------------------------------------------------------------------------------------------------------------------------------------------------------------------------------------------------------------------------------------------------------------------------------------------------------------------------------------------------------------------|
| Journal:                      | <i>BMJ Open</i>                                                                                                                                                                                                                                                                                                                                                                                                                                                                                                                                                                                                                                                                                                                                                                                                                                                                                                                                                                                                                                                                                                                                                                                                                                                                                                                                                                                                                                                                                                                                                                                                                                                                                                                                                                                                                                                                                                                                                                                                                                                                                                                                                                                                                  |
| Manuscript ID                 | bmjopen-2021-052795                                                                                                                                                                                                                                                                                                                                                                                                                                                                                                                                                                                                                                                                                                                                                                                                                                                                                                                                                                                                                                                                                                                                                                                                                                                                                                                                                                                                                                                                                                                                                                                                                                                                                                                                                                                                                                                                                                                                                                                                                                                                                                                                                                                                              |
| Article Type:                 | Protocol                                                                                                                                                                                                                                                                                                                                                                                                                                                                                                                                                                                                                                                                                                                                                                                                                                                                                                                                                                                                                                                                                                                                                                                                                                                                                                                                                                                                                                                                                                                                                                                                                                                                                                                                                                                                                                                                                                                                                                                                                                                                                                                                                                                                                         |
| Date Submitted by the Author: | 25-Apr-2021                                                                                                                                                                                                                                                                                                                                                                                                                                                                                                                                                                                                                                                                                                                                                                                                                                                                                                                                                                                                                                                                                                                                                                                                                                                                                                                                                                                                                                                                                                                                                                                                                                                                                                                                                                                                                                                                                                                                                                                                                                                                                                                                                                                                                      |
| Complete List of Authors:     | <p>Kantorová, Lucia; Masaryk University Faculty of Medicine, Czech National Centre for Evidence-Based Healthcare and Knowledge Translation (Cochrane Czech Republic, Czech EBHC: JBI Center of Excellence, Masaryk University GRADE Centre); Palacky University Olomouc Faculty of Education, Center of Evidence-Based Education &amp; Arts Therapies, Faculty of Education</p> <p>Kantor, Jiří; Palacky University Olomouc, Institute of Special Educational Studies; Palacky University Olomouc Faculty of Education, Center of Evidence-Based Education &amp; Arts Therapies, Faculty of Education</p> <p>Bůřil, Jiří; Masaryk University Faculty of Medicine, Czech National Centre for Evidence-Based Healthcare and Knowledge Translation (Cochrane Czech Republic, Czech EBHC: JBI Center of Excellence, Masaryk University GRADE Centre); Masaryk University Faculty of Medicine, Ist Department of Neurology, St. Anne´s University Hospital</p> <p>Bůřilová, Petra; Masaryk University Faculty of Medicine, Czech National Centre for Evidence-Based Healthcare and Knowledge Translation (Cochrane Czech Republic, Czech EBHC: JBI Center of Excellence, Masaryk University GRADE Centre); Masaryk University, Department of Nursing and Midwifery</p> <p>SLEZAKOVA, Simona; Masaryk University Faculty of Medicine, Czech National Centre for Evidence-Based Healthcare and Knowledge Translation (Cochrane Czech Republic, Czech EBHC: JBI Center of Excellence, Masaryk University GRADE Centre); Institute of Health Information and Statistics of the Czech Republic</p> <p>Nečas, Tomáš; Masaryk University Faculty of Medicine, Czech National Centre for Evidence-Based Healthcare and Knowledge Translation (Cochrane Czech Republic, Czech EBHC: JBI Center of Excellence, Masaryk University GRADE Centre); Institute of Health Information and Statistics of the Czech Republic</p> <p>KLUGAR, Miloslav; Masaryk University Faculty of Medicine, Czech National Centre for Evidence-Based Healthcare and Knowledge Translation (Cochrane Czech Republic, Czech EBHC: JBI Center of Excellence, Masaryk University GRADE Centre); Institute of Health Information and Statistics of the Czech Republic</p> |
| Keywords:                     | SURGERY, Protocols & guidelines < HEALTH SERVICES ADMINISTRATION & MANAGEMENT, ANAESTHETICS, STATISTICS & RESEARCH METHODS                                                                                                                                                                                                                                                                                                                                                                                                                                                                                                                                                                                                                                                                                                                                                                                                                                                                                                                                                                                                                                                                                                                                                                                                                                                                                                                                                                                                                                                                                                                                                                                                                                                                                                                                                                                                                                                                                                                                                                                                                                                                                                       |
|                               |                                                                                                                                                                                                                                                                                                                                                                                                                                                                                                                                                                                                                                                                                                                                                                                                                                                                                                                                                                                                                                                                                                                                                                                                                                                                                                                                                                                                                                                                                                                                                                                                                                                                                                                                                                                                                                                                                                                                                                                                                                                                                                                                                                                                                                  |

1  
2  
3  
4  
5  
6  
7  
8  
9  
10  
11  
12  
13  
14  
15  
16  
17  
18  
19  
20  
21  
22  
23  
24  
25  
26  
27  
28  
29  
30  
31  
32  
33  
34  
35  
36  
37  
38  
39  
40  
41  
42  
43  
44  
45  
46  
47  
48  
49  
50  
51  
52  
53  
54  
55  
56  
57  
58  
59  
60

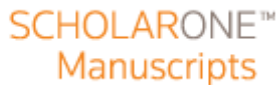

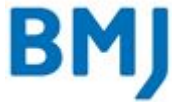

I, the Submitting Author has the right to grant and does grant on behalf of all authors of the Work (as defined in the below author licence), an exclusive licence and/or a non-exclusive licence for contributions from authors who are: i) UK Crown employees; ii) where BMJ has agreed a CC-BY licence shall apply, and/or iii) in accordance with the terms applicable for US Federal Government officers or employees acting as part of their official duties; on a worldwide, perpetual, irrevocable, royalty-free basis to BMJ Publishing Group Ltd ("BMJ") its licensees and where the relevant Journal is co-owned by BMJ to the co-owners of the Journal, to publish the Work in this journal and any other BMJ products and to exploit all rights, as set out in our [licence](#).

The Submitting Author accepts and understands that any supply made under these terms is made by BMJ to the Submitting Author unless you are acting as an employee on behalf of your employer or a postgraduate student of an affiliated institution which is paying any applicable article publishing charge ("APC") for Open Access articles. Where the Submitting Author wishes to make the Work available on an Open Access basis (and intends to pay the relevant APC), the terms of reuse of such Open Access shall be governed by a Creative Commons licence – details of these licences and which [Creative Commons](#) licence will apply to this Work are set out in our licence referred to above.

Other than as permitted in any relevant BMJ Author's Self Archiving Policies, I confirm this Work has not been accepted for publication elsewhere, is not being considered for publication elsewhere and does not duplicate material already published. I confirm all authors consent to publication of this Work and authorise the granting of this licence.

# Quality assessment of clinical practice guidelines for perioperative care and use of GRADE: a systematic review protocol

Lucia Kantorová<sup>1,2,3,4,6</sup> Jiří Kantor<sup>2,3</sup> Jiří Bůřil<sup>1,4,5</sup> Petra Bůřilová<sup>1,4,6,7</sup> Simona Slezáková<sup>1,4,7</sup>

Tomáš Nečas<sup>1,4</sup> Miloslav Klugar<sup>1,4,6,7</sup>

<sup>1</sup> Czech National Centre for Evidence-Based Healthcare and Knowledge Translation (Cochrane Czech Republic, Czech EBHC: JBI Center of Excellence, Masaryk University GRADE Centre), Institute of Biostatistics and Analyses, Faculty of Medicine, Masaryk University, Brno, Czech Republic

<sup>2</sup> Center of Evidence-Based Education & Arts Therapies, Faculty of Education, Palacky University, Olomouc, Czech Republic

<sup>3</sup> Institute of Special Education Studies, Faculty of Education, Palacky University, Olomouc, Czech Republic

<sup>4</sup> Czech Health Research Council, Prague, Czech Republic

<sup>5</sup> 1st Department of Neurology, St. Anne's University Hospital, Faculty of Medicine, Masaryk University, Brno, Czech Republic

<sup>6</sup> Department of Nursing and Midwifery, Department of Public Health, Faculty of Medicine, Masaryk University, Brno, Czech Republic

<sup>7</sup> Institute of Health Information and Statistics of the Czech Republic, Prague, Czech Republic

## Corresponding author:

Lucia Kantorova

The Czech National Centre for Evidence-Based Healthcare and Knowledge Translation

Institute of Biostatistics and Analyses

Faculty of Medicine, Masaryk University

Kamenice 3

Brno, 625 00, Czech Republic

Tel: +420 725 515 244

E-mail: lucia.kantorova@mail.muni.cz

Word count: 1718

## Abstract

Introduction: Perioperative care is a broad field covering an array of elective and emergency procedures. Clinical practice guidelines (CPGs) for perioperative care exist with a various degree of methodological quality and we intend to critically appraise them using AGREE II instrument and investigate the use of GRADE.

Methods and analysis: We searched MEDLINE (Ovid), Epistemonikos, and PROSPERO and did not identify any similar systematic review in this area. Databases, repositories, and websites of guideline developers and medical societies will be searched, including MEDLINE (Ovid), Embase (Ovid), DynaMed, Guidelines International Network (G-I-N), BIGG base internacional de guías GRADE, ECRI Guideline Trust or National Institute for Clinical Evidence (NICE) to identify all CPGs for perioperative care in adult population in a general clinical setting. Any CPGs, expert guidance, position papers, guidance documents, and consensus statements published in the last five years by experts or international organizations that provide guidance or recommendations in the available full text will be included with no geographical, or language limitation. Excluded will be those containing only good practice statements. Critical appraisal using the AGREE II tool will be performed by two independent reviewers. The data presented in a narrative and tabular form will include the results of the critical appraisal for all identified CPGs for all AGREE II domains, and an assessment of the use of the GRADE approach.

Ethics and dissemination: Ethics approval is not required. Findings will be disseminated through professional networks, conference presentations and publication in a scientific journal.

**Keywords:** Perioperative care; Surgery; Recommendations; Guidelines; GRADE; AGREE II

## Article Summary

Strengths and limitations of this study

We intend to comprehensively search for the best quality clinical practice guidelines (CPGs) for perioperative care in bibliographical databases MEDLINE (Ovid) and Embase (Ovid) and specific guideline repositories.

We will identify the CPGs that cover a range of issues such as assessing the risks of surgeries, prevention of adverse events, pain management, transfusion management, antibiotic prophylaxis, and more. The review will not focus on any specific type of surgery or patient population.

We will search for and include CPGs in all languages and geographical contexts in the last five years to provide an assessment of the rigor of development and methodological quality of current CPGs in perioperative care. We will also review the use of the GRADE approach.

The main aim and strength of the review will be in the comprehensive search strategy, and the assessment of methodological quality of the CPGs by professional methodologists using the AGREE II tool. We do not intend to extract the recommendations from the identified relevant

1  
2  
3 CPGs. We will, however, summarize the main strengths and weaknesses of the process of  
4 CPG development in perioperative care and suggest ways of improvement.  
5  
6

## 7 **INTRODUCTION**

8

9  
10 The worldwide increase in the prevalence of chronic diseases places an enormous clinical and  
11 financial burden on healthcare providers.[1] For these reasons, the current acutely oriented  
12 healthcare systems have been transformed into more flexible systems capable of providing  
13 effective and high-quality chronic care, and preventive measures have also been proposed for  
14 patients and healthy populations.[2, 3] Surgery is an integral part of global health care with an  
15 estimated 234 million major surgical procedures performed annually.[4] The essential surgical  
16 and anesthetic services are increasingly acknowledged as possible key factors in reducing  
17 death and disability for developing countries whilst remaining cost-effective.[5]  
18  
19

20 Perioperative care is a broad field covering an array of elective and emergency procedures.[6]  
21 It includes interventional, mini-invasive, diagnostic or therapeutic care in close cooperation  
22 with nursing care. Patients must be carefully evaluated for risks, and each intervention must  
23 be weighed for benefits, patient values, complications, and cost-effectiveness. Clinical  
24 practice guidelines (CPG) may streamline perioperative management of patients and improve  
25 outcomes, may even form policy and legislation. A systematic review of CPGs for  
26 perioperative care may be useful in assessing their quality, and thus help to choose the best  
27 available guideline for adoption or adaptation across the world.  
28  
29

30  
31 The AGREE II instrument[7] is used to appraise the quality of CPGs. It also helps guideline  
32 working groups by providing a methodologic and reporting strategy for CPG development[8],  
33 together with GIN-McMaster Guideline Development Checklist.[9] It ascertains the measure  
34 of “confidence that the potential biases of guideline development have been addressed  
35 adequately and that the recommendations are both internally and externally valid, and are  
36 feasible for practice”. [8] Currently, the most rigorous and transparent methodology for  
37 developing CPGs is the Grading of Recommendations, Assessment, Development and  
38 Evaluations (GRADE) approach.[10] However, other approaches, mostly based on the  
39 assessment of the research design of primary studies, exist and are in use, as are various  
40 modifications of the GRADE approach.  
41  
42

43  
44 Guidelines for perioperative care exist with a various degree of methodological quality and  
45 we intend to critically appraise them using the AGREE II tool, and investigate the use of  
46 GRADE approach. We searched MEDLINE (Ovid), Epistemonikos, and PROSPERO, and  
47 did not identify any similar systematic review in this area, although such reviews exist for  
48 other topics, specific populations or more narrowly defined perioperative care aspects.  
49

50  
51 This work is a part of the Czech National project of CPG development,[11] the first such  
52 national endeavor in the country. We chose perioperative care based on the growing need for  
53 evidence-based recommendations in the Czech Republic in consultation with the key  
54 stakeholders (the Ministry of Health, heads of appropriate Czech professional organizations,  
55 health insurance deputies). Based on this work, an adaptation of a high-quality CPG will take  
56 place in 2021 and will ultimately be published under the Czech Ministry of Health.  
57  
58  
59  
60

## Research question/objective:

The review question for this systematic review is framed using the ‘Population and Clinical Areas, Interventions, Comparators, Attributes of CPGs and Recommendation characteristics’ (PICAR) elements[12]: What is the methodological quality of clinical practice guidelines containing recommendations for perioperative care in the adult population for the general surgical setting?

## METHODS AND ANALYSIS

### Eligibility criteria

#### Population and clinical indications

The search will be performed to identify all clinical practice guidelines for general perioperative care in the adult population (specific age as defined by the CPGs, e.g., typically 16 or 18). We will not include CPGs on other than adult population or those for specific populations or aims (e.g., only gynecologic patients, to prevent dementia, head and neck cancer patients, opioid-naïve patients).

#### Intervention and Comparators

We will aim to identify CPGs in the general area of perioperative care for non-specialized surgeries (not specific for any given type of surgery). The CPG should cover a broad spectrum of questions for pre-, intra- and post-operative care, such as assessing the risks of surgeries, prevention of adverse events, pain management, transfusion management, antibiotic prophylaxis, maintenance of normothermia, fluid and intake management, advice and mental preparation of patients, any supplements needed, anticoagulant therapy, control during surgery, and more, and be applicable to any surgical setting. We will include a CPG if its scope covers at least 3 of these or similar areas. The CPG will be excluded if targeting only one type of clinical specialist, disease, surgery, aim or setting (e.g., the role of neuroimaging, for total hip replacement only).

#### Attributes of eligible CPGs

We will include any self-identified CPGs, expert guidance, position papers, guidance documents, and consensus statements published in the last five years by experts in the field or international organizations on the given topic and population, that provide guidance or recommendations in the full text with no geographical, or language limitation. We will include only the latest version of the CPG. We will include CPGs of any quality. Excluded will be papers containing only good practice statements[13] or CPGs with unavailable full text (exclusions will be recorded and reported).

#### Recommendation characteristics

The CPG should contain clearly identifiable recommendations. Excluded will be papers containing only good practice statements.

### Types of resources and search strategy

The databases and guideline repositories to be searched include MEDLINE (Ovid), Embase (Ovid), DynaMed, Guidelines International Network (G-I-N), BIGG base internacional de



1  
2  
3 guías GRADE or ECRI Guideline Trust. Sources of unpublished documents and grey  
4 literature to be searched include websites of guidelines developers as National Institute for  
5 Clinical Evidence (NICE), Scottish Intercollegiate Guidelines Network (SIGN),  
6 Arbeitsgemeinschaft der Wissenschaftlichen Medizinischen Fachgesellschaften (AWMF),  
7 KCE Belgian Health Care Knowledge Centre, Haute Autorité de Santé (HAS), ISCI; or  
8 websites of other governmental or non-governmental organizations and medical  
9 societies/associations.  
10  
11

12 The search strategy will comprise of the following keywords and related terms: (pre-  
13 operative\* OR preoperative\* OR pre-surg\* OR presurg\* OR perioperative\* OR peri-  
14 operative\* OR intraoperative\* OR intra-operative\* OR intrasurg\* OR intra-surg\* OR  
15 peroperative\* OR per-operative\* OR postoperative\* or post-operative\* or post-surg\* or  
16 postsurg\*) AND (care\* OR caring OR treat\* OR nurs\* OR monitor\* OR recover\* OR  
17 medicine).  
18  
19

20 All identified CPGs will be imported into EndNote X9.2, any duplicates removed, and  
21 titles/abstracts and then full texts screened by two independent reviewers against the  
22 eligibility criteria. Search results will be presented in a PRISMA flowchart.[14]  
23  
24

## 25 **Data extraction**

26 All CPGs will be assessed by at least two independent reviewers and data will be extracted  
27 independently. If needed, guideline developers will be contacted to clarify any uncertainty.  
28 The data to be extracted will include:  
29  
30

- 31 • Guideline field and scope
  - 32 • Year of publication
  - 33 • Publishing region
  - 34 • Version of the guideline
  - 35 • Guideline language
  - 36 • Developing organization
  - 37 • System of rating evidence used in the guideline
- 38  
39  
40  
41  
42

## 43 **Quality assessment**

44 All eligible CPGs will be assessed using the full AGREE II tool to determine the quality of  
45 the guideline development process. Two reviewers will independently assess the CPGs using  
46 AGREE II tool and discuss any conflicts together and with a third senior reviewer. Then, they  
47 will have the opportunity to alter their scoring, if necessary. All review authors are trained in  
48 using AGREE II instrument. The junior methodologists will be supervised as needed.  
49  
50

51 AGREE II is a 23-item instrument divided into six domains: scope and purpose, stakeholder  
52 involvement, rigor of development, clarity of presentation, applicability and editorial  
53 independence. The whole tool will be used to appraise each identified CPG and each item will  
54 be scored using a 7-point Likert scale, ranging from strongly disagree (1) to strongly agree  
55 (7). In addition, an overall assessment score will be given to each CPG.  
56  
57  
58

## 59 **Data analysis and presentation**

1  
2  
3 The extracted data will be analyzed and summarized in a tabular and narrative form. A table  
4 with the characteristics of the identified relevant CPGs and the system used for grading the  
5 evidence and recommendations will be provided. We will narratively summarize the  
6 characteristics of the grading systems used, the rationale behind them and how it may have  
7 influenced the overall quality of the respective CPGs.  
8  
9

10 We will report and analyze the rigor of development as depicted by the scores of the AGREE  
11 II tool, specifically, the sums of scores of each item for each of the six domains from each  
12 reviewer, and then percentage of the total scaled from the number. Same for the assessment of  
13 the overall guideline quality.  
14

15 However, the guideline quality will be ascertained based on the scaled domain scores. We  
16 will calculate the inter-rater reliability (via the intraclass correlation coefficient (ICC)) for  
17 each domain to determine the reviewer agreement.  
18  
19

20 The results of this systematic review will be reported using the Preferred Reporting Items for  
21 Systematic Reviews and Meta-Analysis statement.[14] Any changes made to the methodology  
22 described in this protocol will be reported and explained in the systematic review. We used  
23 the PRISMA-P checklist when writing our report.[15] We fully intend to publish all results of  
24 the proposed systematic review in a scholarly open-access journal.  
25  
26

## 27 **POTENTIAL IMPACT OF THIS RESEARCH**

28  
29  
30 This research will inform what quality are the available CPGs in perioperative care in any  
31 language and geographical context and how GRADE is used and possibly modified. It may  
32 also be used as a methodological guide to selecting the most robust, transparent and  
33 trustworthy existing guideline for adoption or adaptation by local and national organizations.  
34 Although we will not extract the actual recommendations from the identified relevant CPGs,  
35 we will summarize the main strengths and weaknesses in the process of their development  
36 and suggest ways of improvement. The review might be viewed as a feedback to the guideline  
37 developers and may provide data for future monitoring and improvement of the guideline  
38 development processes.  
39  
40  
41

## 42 **REFERENCES**

- 43  
44  
45 1 Murray CJ, Vos T, Lozano R, et al. Disability adjusted life years (DALYs) for 291 diseases and  
46 injuries in 21 regions, 1990–2010: a systematic analysis for the global burden of disease study  
47 2010. *Lancet* 2012;380:2197–2223. doi:10.1016/S0140-6736(12)61689-4
- 48  
49 2 Gobbo M, Saldaña R, Rodríguez M, et al. Patients' Experience and Needs During Perioperative  
50 Care: A Focus Group Study. *Patient Prefer Adherence* 2020;14:891–902.  
51 doi:10.2147/PPA.S252670
- 52  
53 3 Meara JG, Leather AJ, Hagander L, et al. “Global Surgery 2030: evidence and solutions for  
54 achieving health, welfare, and economic development.” *Int J Obstet Anesth* 2016;25:75–8.  
55 doi:10.1016/j.ijoa.2015.09.006
- 56  
57 4 Bengoa R. Transforming health care: an approach to system-wide implementation. *Int J Integr*  
58 *Care* 2013;13:e039. doi:10.5334/ijic.1206
- 59  
60 5 Davis Y, Perham M, Hurd AM, et al. Patient and family member needs during the perioperative  
period. *J Perianesth Nurs* 2014;29:119–128. doi:10.1016/j.jopan.2013.05.013

- 6 Engelman DT, Ben Ali W, Williams JB, et al. Guidelines for Perioperative Care in Cardiac Surgery: Enhanced Recovery After Surgery Society Recommendations. *JAMA Surg* 2019;154:755–766. doi:10.1001/jamasurg.2019.1153
- 7 Brouwers MC, Kho ME, Browman GP, et al. AGREE II: advancing guideline development, reporting and evaluation in health care. *CMAJ* 2010;182:E839–E842. doi:10.1503/cmaj.090449
- 8 Dans AL, Dans LF. Appraising a tool for guideline appraisal (the AGREE II instrument). *J Clin Epidemiol*. 2010;63:P1281-1282. doi:10.1016/j.jclinepi.2010.06.005
- 9 Schönemann JH, Wiercioch W, Etxeandia I, et al. Guidelines 2.0: systematic development of a comprehensive checklist for a successful guideline enterprise. *CMAJ* 2014;186:E123–E142. doi:10.1503/cmaj.131237
- 10 Schönemann H, Brožek J, Guyatt G, et al. GRADE handbook for grading quality of evidence and strength of recommendations. The GRADE Working Group; 2013. Available online <https://gdt.gradepro.org/app/handbook/handbook.html> (accessed on 12 April 2021).
- 11 KDP [online]. National methodology of CPG development. Praha: ÚZIS ČR, 2020. Available online: <https://kdp.uzis.cz/index-en.php?pg=methodology> (accessed on 12 April 2021).
- 12 Johnston A, Kelly SE, Hsieh SC, et al. Systematic reviews of clinical practice guidelines: a methodological guide. *J Clin Epidemiol* 2019;108:64–76. doi:10.1016/j.jclinepi.2018.11.030
- 13 Guyatt GH, Schönemann HJ, Djulbegovic B, et al. Guideline panels should not GRADE good practice statements. *J Clin Epidemiol*. 2015;68:597–600. doi:10.1016/j.jclinepi.2014.12.011
- 14 Page MJ, McKenzie JE, Bossuyt PM, et al. The PRISMA 2020 statement: an updated guideline for reporting systematic reviews. *BMJ* 2021;372:n71. doi:10.1136/bmj.n71
- 15 Moher D, Shamseer L, Clarke M, et al. Preferred Reporting Items for Systematic Review and Meta-Analysis Protocols (PRISMA-P) 2015 statement. *Syst Rev* 2015;4(1):1.

## Footnotes

**Contributions:** Conceptualization, MK and LK; Methodology, MK, LK, SS, TN; Validation, MK; Writing – Original Draft Preparation, LK, PB, JB; Writing – Review & Editing, PB, JB, TN, SS, MK, JK; Supervision, MK; Funding Acquisition, LK; Search strategy, SS.

**Competing interests:** The authors declare no financial conflict of interest. JK is a director of Center of Evidence-Based Education & Arts Therapies, Faculty of Education, Palacky University, MK and LK are director and acting deputy director of the Czech National Centre for Evidence-Based Healthcare and Knowledge Translation. LK, MK (head methodologist), PB, JB, SS and TN are involved in a Czech national project for the development of clinical practice guidelines as methodologists.

**Funding:** This work was funded from project: Methodological and practical aspects of the development of guidelines and rapid guidelines in public health (MUNI/IGA/1068/2020). The funding agency did not influence any aspect of this work.

**Patient consent for publication:** Not required.

**Provenance and peer review:** Not commissioned; externally peer reviewed.

# Reporting checklist for protocol of a systematic review and meta analysis.

Based on the PRISMA-P guidelines.

## Instructions to authors

Complete this checklist by entering the page numbers from your manuscript where readers will find each of the items listed below.

Your article may not currently address all the items on the checklist. Please modify your text to include the missing information. If you are certain that an item does not apply, please write "n/a" and provide a short explanation.

Upload your completed checklist as an extra file when you submit to a journal.

In your methods section, say that you used the PRISMA-Reporting guidelines, and cite them as:

Moher D, Shamseer L, Clarke M, Ghersi D, Liberati A, Petticrew M, Shekelle P, Stewart LA. Preferred Reporting Items for Systematic Review and Meta-Analysis Protocols (PRISMA-P) 2015 statement. *Syst Rev.* 2015;4(1):1.

|                     |                     | Reporting Item                                                                                                                            | Page Number |
|---------------------|---------------------|-------------------------------------------------------------------------------------------------------------------------------------------|-------------|
| <b>Title</b>        |                     |                                                                                                                                           |             |
| Identification      | <a href="#">#1a</a> | Identify the report as a protocol of a systematic review                                                                                  | 1           |
| Update              | <a href="#">#1b</a> | If the protocol is for an update of a previous systematic review, identify as such                                                        | n/a         |
| <b>Registration</b> |                     |                                                                                                                                           |             |
|                     | <a href="#">#2</a>  | If registered, provide the name of the registry (such as PROSPERO) and registration number                                                | n/a         |
| <b>Authors</b>      |                     |                                                                                                                                           |             |
| Contact             | <a href="#">#3a</a> | Provide name, institutional affiliation, e-mail address of all protocol authors; provide physical mailing address of corresponding author | 1           |
| Contribution        | <a href="#">#3b</a> | Describe contributions of protocol authors and identify the guarantor of the review                                                       | 1           |

## Amendments

|  |                    |                                                                                                                                                                                                 |   |
|--|--------------------|-------------------------------------------------------------------------------------------------------------------------------------------------------------------------------------------------|---|
|  | <a href="#">#4</a> | If the protocol represents an amendment of a previously completed or published protocol, identify as such and list changes; otherwise, state plan for documenting important protocol amendments | 6 |
|--|--------------------|-------------------------------------------------------------------------------------------------------------------------------------------------------------------------------------------------|---|

## Support

|                           |                     |                                                                                                      |   |
|---------------------------|---------------------|------------------------------------------------------------------------------------------------------|---|
| Sources                   | <a href="#">#5a</a> | Indicate sources of financial or other support for the review                                        | 7 |
| Sponsor                   | <a href="#">#5b</a> | Provide name for the review funder and / or sponsor                                                  | 7 |
| Role of sponsor or funder | <a href="#">#5c</a> | Describe roles of funder(s), sponsor(s), and / or institution(s), if any, in developing the protocol | 7 |

## Introduction

|            |                    |                                                                                                                                                          |   |
|------------|--------------------|----------------------------------------------------------------------------------------------------------------------------------------------------------|---|
| Rationale  | <a href="#">#6</a> | Describe the rationale for the review in the context of what is already known                                                                            | 2 |
| Objectives | <a href="#">#7</a> | Provide an explicit statement of the question(s) the review will address with reference to participants, interventions, comparators, and outcomes (PICO) | 4 |

## Methods

|                                   |                      |                                                                                                                                                                                                                               |     |
|-----------------------------------|----------------------|-------------------------------------------------------------------------------------------------------------------------------------------------------------------------------------------------------------------------------|-----|
| Eligibility criteria              | <a href="#">#8</a>   | Specify the study characteristics (such as PICO, study design, setting, time frame) and report characteristics (such as years considered, language, publication status) to be used as criteria for eligibility for the review | 4   |
| Information sources               | <a href="#">#9</a>   | Describe all intended information sources (such as electronic databases, contact with study authors, trial registers or other grey literature sources) with planned dates of coverage                                         | 4-5 |
| Search strategy                   | <a href="#">#10</a>  | Present draft of search strategy to be used for at least one electronic database, including planned limits, such that it could be repeated                                                                                    | 5   |
| Study records - data management   | <a href="#">#11a</a> | Describe the mechanism(s) that will be used to manage records and data throughout the review                                                                                                                                  | n/a |
| Study records - selection process | <a href="#">#11b</a> | State the process that will be used for selecting studies (such as two independent reviewers) through each phase of the review (that is, screening, eligibility and inclusion in meta-analysis)                               | 5   |
| Study records - data              | <a href="#">#11c</a> | Describe planned method of extracting data from reports (such as                                                                                                                                                              | 5   |

|    |                    |                      |                                                                           |     |
|----|--------------------|----------------------|---------------------------------------------------------------------------|-----|
| 1  | collection process |                      | piloting forms, done independently, in duplicate), any processes for      |     |
| 2  |                    |                      | obtaining and confirming data from investigators                          |     |
| 3  |                    |                      |                                                                           |     |
| 4  | Data items         | <a href="#">#12</a>  | List and define all variables for which data will be sought (such as      | 5   |
| 5  |                    |                      | PICO items, funding sources), any pre-planned data assumptions and        |     |
| 6  |                    |                      | simplifications                                                           |     |
| 7  |                    |                      |                                                                           |     |
| 8  |                    |                      |                                                                           |     |
| 9  | Outcomes and       | <a href="#">#13</a>  | List and define all outcomes for which data will be sought, including     | n/a |
| 10 | prioritization     |                      | prioritization of main and additional outcomes, with rationale            |     |
| 11 |                    |                      |                                                                           |     |
| 12 |                    |                      |                                                                           |     |
| 13 | Risk of bias in    | <a href="#">#14</a>  | Describe anticipated methods for assessing risk of bias of individual     | 5   |
| 14 | individual studies |                      | studies, including whether this will be done at the outcome or study      |     |
| 15 |                    |                      | level, or both; state how this information will be used in data synthesis |     |
| 16 |                    |                      |                                                                           |     |
| 17 |                    |                      |                                                                           |     |
| 18 | Data synthesis     | <a href="#">#15a</a> | Describe criteria under which study data will be quantitatively           | 5-6 |
| 19 |                    |                      | synthesised                                                               |     |
| 20 |                    |                      |                                                                           |     |
| 21 |                    |                      |                                                                           |     |
| 22 | Data synthesis     | <a href="#">#15b</a> | If data are appropriate for quantitative synthesis, describe planned      | n/a |
| 23 |                    |                      | summary measures, methods of handling data and methods of                 |     |
| 24 |                    |                      | combining data from studies, including any planned exploration of         |     |
| 25 |                    |                      | consistency (such as I <sup>2</sup> , Kendall's $\tau$ )                  |     |
| 26 |                    |                      |                                                                           |     |
| 27 |                    |                      |                                                                           |     |
| 28 |                    |                      |                                                                           |     |
| 29 | Data synthesis     | <a href="#">#15c</a> | Describe any proposed additional analyses (such as sensitivity or         | n/a |
| 30 |                    |                      | subgroup analyses, meta-regression)                                       |     |
| 31 |                    |                      |                                                                           |     |
| 32 |                    |                      |                                                                           |     |
| 33 | Data synthesis     | <a href="#">#15d</a> | If quantitative synthesis is not appropriate, describe the type of        | 6   |
| 34 |                    |                      | summary planned                                                           |     |
| 35 |                    |                      |                                                                           |     |
| 36 |                    |                      |                                                                           |     |
| 37 | Meta-bias(es)      | <a href="#">#16</a>  | Specify any planned assessment of meta-bias(es) (such as publication      | n/a |
| 38 |                    |                      | bias across studies, selective reporting within studies)                  |     |
| 39 |                    |                      |                                                                           |     |
| 40 |                    |                      |                                                                           |     |
| 41 | Confidence in      | <a href="#">#17</a>  | Describe how the strength of the body of evidence will be assessed        | n/a |
| 42 | cumulative         |                      | (such as GRADE)                                                           |     |
| 43 | evidence           |                      |                                                                           |     |
| 44 |                    |                      |                                                                           |     |
| 45 |                    |                      |                                                                           |     |

46 The PRISMA-P elaboration and explanation paper is distributed under the terms of the Creative Commons  
 47 Attribution License CC-BY. This checklist was completed on 25. April 2021 using  
 48 <https://www.goodreports.org/>, a tool made by the [EQUATOR Network](#) in collaboration with [Penelope.ai](#)  
 49

# BMJ Open

## Quality assessment of clinical practice guidelines for perioperative care and use of GRADE: a systematic review protocol

|                                 |                                                                                                                                                                                                                                                                                                                                                                                                                                                                                                                                                                                                                                                                                                                                                                                                                                                                                                                                                                                                                                                                                                                                                                                                                                                                                                                                                                                                                                                                                                                                                                                                                                                                                                                                                                                     |
|---------------------------------|-------------------------------------------------------------------------------------------------------------------------------------------------------------------------------------------------------------------------------------------------------------------------------------------------------------------------------------------------------------------------------------------------------------------------------------------------------------------------------------------------------------------------------------------------------------------------------------------------------------------------------------------------------------------------------------------------------------------------------------------------------------------------------------------------------------------------------------------------------------------------------------------------------------------------------------------------------------------------------------------------------------------------------------------------------------------------------------------------------------------------------------------------------------------------------------------------------------------------------------------------------------------------------------------------------------------------------------------------------------------------------------------------------------------------------------------------------------------------------------------------------------------------------------------------------------------------------------------------------------------------------------------------------------------------------------------------------------------------------------------------------------------------------------|
| Journal:                        | <i>BMJ Open</i>                                                                                                                                                                                                                                                                                                                                                                                                                                                                                                                                                                                                                                                                                                                                                                                                                                                                                                                                                                                                                                                                                                                                                                                                                                                                                                                                                                                                                                                                                                                                                                                                                                                                                                                                                                     |
| Manuscript ID                   | bmjopen-2021-052795.R1                                                                                                                                                                                                                                                                                                                                                                                                                                                                                                                                                                                                                                                                                                                                                                                                                                                                                                                                                                                                                                                                                                                                                                                                                                                                                                                                                                                                                                                                                                                                                                                                                                                                                                                                                              |
| Article Type:                   | Protocol                                                                                                                                                                                                                                                                                                                                                                                                                                                                                                                                                                                                                                                                                                                                                                                                                                                                                                                                                                                                                                                                                                                                                                                                                                                                                                                                                                                                                                                                                                                                                                                                                                                                                                                                                                            |
| Date Submitted by the Author:   | 30-Oct-2021                                                                                                                                                                                                                                                                                                                                                                                                                                                                                                                                                                                                                                                                                                                                                                                                                                                                                                                                                                                                                                                                                                                                                                                                                                                                                                                                                                                                                                                                                                                                                                                                                                                                                                                                                                         |
| Complete List of Authors:       | <p>Kantorová, Lucia; Masaryk University Faculty of Medicine, Czech National Centre for Evidence-Based Healthcare and Knowledge Translation, Institute of Biostatistics and Analyses; Masaryk University Faculty of Medicine, Department of Public Health</p> <p>Kantor, Jiří; Palacky University Olomouc Faculty of Education, Institute of Special Educational Studies; Palacky University Olomouc Faculty of Education, Center of Evidence-Based Education &amp; Arts Therapies: A JBI Affiliated Group</p> <p>Bůřil, Jiří; Masaryk University Faculty of Medicine, Czech National Centre for Evidence-Based Healthcare and Knowledge Translation, Institute of Biostatistics and Analyses; Masaryk University Faculty of Medicine, 1st Department of Neurology, St. Anne's University Hospital</p> <p>Bůřilová, Petra; Masaryk University Faculty of Medicine, Czech National Centre for Evidence-Based Healthcare and Knowledge Translation, Institute of Biostatistics and Analyses</p> <p>SLEZAKOVA, Simona; Masaryk University Faculty of Medicine, Czech National Centre for Evidence-Based Healthcare and Knowledge Translation, Institute of Biostatistics and Analyses; Institute of Health Information and Statistics of the Czech Republic</p> <p>Nečas, Tomáš; Masaryk University Faculty of Medicine, Czech National Centre for Evidence-Based Healthcare and Knowledge Translation, Institute of Biostatistics and Analyses; Institute of Health Information and Statistics of the Czech Republic</p> <p>KLUGAR, Miloslav; Masaryk University Faculty of Medicine, Czech National Centre for Evidence-Based Healthcare and Knowledge Translation, Institute of Biostatistics and Analyses; Institute of Health Information and Statistics of the Czech Republic</p> |
| <b>Primary Subject Heading</b>: | Surgery                                                                                                                                                                                                                                                                                                                                                                                                                                                                                                                                                                                                                                                                                                                                                                                                                                                                                                                                                                                                                                                                                                                                                                                                                                                                                                                                                                                                                                                                                                                                                                                                                                                                                                                                                                             |
| Secondary Subject Heading:      | Evidence based practice                                                                                                                                                                                                                                                                                                                                                                                                                                                                                                                                                                                                                                                                                                                                                                                                                                                                                                                                                                                                                                                                                                                                                                                                                                                                                                                                                                                                                                                                                                                                                                                                                                                                                                                                                             |
| Keywords:                       | Protocols & guidelines < HEALTH SERVICES ADMINISTRATION & MANAGEMENT, STATISTICS & RESEARCH METHODS, SURGERY, Quality in health care < HEALTH SERVICES ADMINISTRATION & MANAGEMENT                                                                                                                                                                                                                                                                                                                                                                                                                                                                                                                                                                                                                                                                                                                                                                                                                                                                                                                                                                                                                                                                                                                                                                                                                                                                                                                                                                                                                                                                                                                                                                                                  |
|                                 |                                                                                                                                                                                                                                                                                                                                                                                                                                                                                                                                                                                                                                                                                                                                                                                                                                                                                                                                                                                                                                                                                                                                                                                                                                                                                                                                                                                                                                                                                                                                                                                                                                                                                                                                                                                     |

1  
2  
3  
4  
5  
6  
7  
8  
9  
10  
11  
12  
13  
14  
15  
16  
17  
18  
19  
20  
21  
22  
23  
24  
25  
26  
27  
28  
29  
30  
31  
32  
33  
34  
35  
36  
37  
38  
39  
40  
41  
42  
43  
44  
45  
46  
47  
48  
49  
50  
51  
52  
53  
54  
55  
56  
57  
58  
59  
60

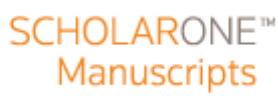





I, the Submitting Author has the right to grant and does grant on behalf of all authors of the Work (as defined in the below author licence), an exclusive licence and/or a non-exclusive licence for contributions from authors who are: i) UK Crown employees; ii) where BMJ has agreed a CC-BY licence shall apply, and/or iii) in accordance with the terms applicable for US Federal Government officers or employees acting as part of their official duties; on a worldwide, perpetual, irrevocable, royalty-free basis to BMJ Publishing Group Ltd ("BMJ") its licensees and where the relevant Journal is co-owned by BMJ to the co-owners of the Journal, to publish the Work in this journal and any other BMJ products and to exploit all rights, as set out in our [licence](#).

The Submitting Author accepts and understands that any supply made under these terms is made by BMJ to the Submitting Author unless you are acting as an employee on behalf of your employer or a postgraduate student of an affiliated institution which is paying any applicable article publishing charge ("APC") for Open Access articles. Where the Submitting Author wishes to make the Work available on an Open Access basis (and intends to pay the relevant APC), the terms of reuse of such Open Access shall be governed by a Creative Commons licence – details of these licences and which [Creative Commons](#) licence will apply to this Work are set out in our licence referred to above.

Other than as permitted in any relevant BMJ Author's Self Archiving Policies, I confirm this Work has not been accepted for publication elsewhere, is not being considered for publication elsewhere and does not duplicate material already published. I confirm all authors consent to publication of this Work and authorise the granting of this licence.

# Quality assessment of clinical practice guidelines for perioperative care and use of GRADE: a systematic review protocol

Lucia Kantorová<sup>1,2,3,4,5</sup> Jiří Kantor<sup>2,3</sup> Jiří Bůřil<sup>1,4,6</sup> Petra Bůřilová<sup>1,4,5</sup> Simona Slezáková<sup>1,4,7</sup>

Tomáš Nečas<sup>1,4</sup> Miloslav Klugar<sup>1,4,7</sup>

<sup>1</sup> Czech National Centre for Evidence-Based Healthcare and Knowledge Translation (Cochrane Czech Republic, Czech EBHC: JBI Center of Excellence, Masaryk University GRADE Centre), Institute of Biostatistics and Analyses, Faculty of Medicine, Masaryk University, Brno, Czech Republic

<sup>2</sup> Center of Evidence-Based Education & Arts Therapies: A JBI Affiliated Group, Faculty of Education, Palacky University, Olomouc, Czech Republic

<sup>3</sup> Institute of Special Education Studies, Faculty of Education, Palacky University, Olomouc, Czech Republic

<sup>4</sup> Czech Health Research Council, Prague, Czech Republic

<sup>5</sup> Department of Public Health, Faculty of Medicine, Masaryk University, Brno, Czech Republic

<sup>6</sup> 1st Department of Neurology, St. Anne's University Hospital, Faculty of Medicine, Masaryk University, Brno, Czech Republic

<sup>7</sup> Institute of Health Information and Statistics of the Czech Republic, Prague, Czech Republic

## Corresponding author:

Lucia Kantorová

The Czech National Centre for Evidence-Based Healthcare and Knowledge Translation

Institute of Biostatistics and Analyses

Faculty of Medicine, Masaryk University

Kamenice 5

Brno, 625 00, Czech Republic

Tel: +420 725 515 244

E-mail: lucia.kantorova@mail.muni.cz

Word count: 1718

## Abstract

Introduction: Perioperative care is a broad field covering an array of elective and emergency procedures. Clinical practice guidelines (CPGs) for perioperative care exist with various degrees of methodological quality. We intend to critically appraise them using AGREE II instrument and investigate the use of GRADE.

Methods and analysis: We searched MEDLINE (Ovid), Epistemonikos, Cochrane Database of Systematic Reviews (CDSR), and PROSPERO and did not identify any similar systematic review in this area. We will search databases, repositories, and websites of guideline developers and medical societies, including MEDLINE (Ovid), Embase (Ovid), DynaMed, the GIN international guideline library and registry of guidelines in development, BIGG international database of GRADE guidelines, ECRI Guideline Trust, or National Institute for Clinical Evidence (NICE) to identify all CPGs for perioperative care in an adult population in a general clinical setting. We will include CPGs, expert guidance, position papers, guidance documents, and consensus statements published in the last five years by experts or international organizations that provide guidance or recommendations in the available full text with no geographical or language limitation. Excluded will be those containing only good practice statements. Two independent reviewers will perform critical appraisal using the AGREE II tool. The data presented in a narrative and tabular form will include the results of the critical appraisal for all identified CPGs for all AGREE II domains and an assessment of the use of the GRADE approach.

Ethics and dissemination: Ethics approval is not required. We will disseminate the findings through professional networks and conference presentations and will publish the results.

**Keywords:** Perioperative care; Surgery; Recommendations; Guidelines; GRADE; AGREE II

## Article Summary

Strengths and limitations of this study

We intend to comprehensively search for the best quality clinical practice guidelines (CPGs) for perioperative care in bibliographical databases MEDLINE (Ovid) and Embase (Ovid) and specific guideline databases and repositories.

We will identify the CPGs that cover a range of issues, such as assessing the risks of surgeries, prevention of adverse events, pain management, transfusion management, antibiotic prophylaxis, and more. The review will not focus on any specific type of surgery or patient population.

We will search for and include CPGs in all languages and geographical contexts in the last five years to provide an assessment of the rigor of development and methodological quality of current CPGs in perioperative care. We will also review the use of the GRADE approach.

The main aim and strength of the review will be in the comprehensive search strategy and the assessment of the methodological quality of the CPGs by professional methodologists using the AGREE II tool. We do not intend to extract the recommendations from the identified

1  
2  
3 relevant CPGs. We will, however, summarize the main strengths and weaknesses of the  
4 process of CPG development in perioperative care and suggest ways of improvement.  
5  
6

## 7 **INTRODUCTION**

8

9  
10 The worldwide increase in the prevalence of chronic diseases places an enormous clinical and  
11 financial burden on healthcare providers.[1] For these reasons, the current acutely oriented  
12 healthcare systems have been transformed into more flexible systems capable of providing  
13 effective and high-quality chronic care, and preventive measures have also been proposed for  
14 patients and healthy populations.[2, 3] surgery is an integral part of global health care, with an  
15 estimated 234 million major surgical procedures performed annually.[4] The essential surgical  
16 and anesthetic services are increasingly acknowledged as possible vital factors in reducing  
17 death and disability for developing countries while remaining cost-effective.[5]  
18  
19

20 Perioperative care is a broad field covering an array of elective and emergency procedures.[6]  
21 It includes interventional, mini-invasive, diagnostic, or therapeutic care in close cooperation  
22 with nursing care. Patients must be carefully evaluated for risks, and each intervention must  
23 be weighed for benefits, patient values, complications, and cost-effectiveness. Clinical  
24 practice guidelines (CPG) may streamline perioperative management of patients and improve  
25 outcomes, may even form policy and legislation. A systematic review of CPGs for  
26 perioperative care may help assess their quality and thus help choose the best available  
27 guideline for adoption or adaptation across the world.  
28  
29

30  
31 The AGREE II instrument[7], published by the AGREE Collaboration in 2010, is used to  
32 appraise the quality of CPGs. It also helps guideline working groups by providing a  
33 methodologic and reporting strategy for CPG development[8], together with the GIN-  
34 McMaster Guideline Development Checklist.[9] It ascertains the measure of “confidence that  
35 the potential biases of guideline development have been addressed adequately and that the  
36 recommendations are both internally and externally valid, and are feasible for practice”.[8]  
37 Currently, the most rigorous and transparent methodology for developing CPGs is the  
38 Grading of Recommendations, Assessment, Development, and Evaluations (GRADE)  
39 approach.[10] However, other systems, primarily based on the assessment of the research  
40 design of primary studies, exist and are in use, as are various modifications of the GRADE  
41 approach.  
42  
43  
44

45 In 2003, the AGREE Collaboration, a group of international guideline developers and  
46 researchers, undertook a project of developing the first AGREE Instrument to develop a tool  
47 to assess the quality of guidelines.[11] It was a 23-item tool organized into six quality  
48 domains. Following this first endeavor, a sub-section of the AGREE Collaboration, the  
49 AGREE Next Steps Research Consortium, was established to improve the AGREE’s  
50 reliability and validity further.[12, 13] The Consortium published the currently widely used  
51 AGREE II tool in 2010, replacing the original instrument, and developed a user’s manual to  
52 facilitate the ability of users to apply the instrument with confidence. Since then, the tool has  
53 received recognition worldwide, and various extensions have been developed and tested.[14]  
54 Guideline developers are also using the tool as a reporting checklist.[15]  
55  
56  
57

58 Guidelines for perioperative care exist with various degrees of methodological quality. We  
59 intend to critically appraise them using the AGREE II tool and investigate the use of the  
60

1  
2  
3 GRADE approach. We searched MEDLINE (Ovid), Epistemonikos, Cochrane Database of  
4 Systematic Reviews (CDSR), and PROSPERO and did not identify any similar systematic  
5 review in this area. However, such reviews exist for other topics, specific populations, or  
6 more narrowly defined perioperative care aspects.  
7

8  
9 This work is a part of the Czech National project of CPG development,[16] the first such  
10 national endeavor in the country. We chose perioperative care based on the growing need for  
11 evidence-based recommendations in the Czech Republic in consultation with the key  
12 stakeholders (the Ministry of Health, heads of appropriate Czech professional organizations,  
13 health insurance deputies). Based on this work, an adaptation of a high-quality CPG will  
14 occur under the Czech Ministry of Health.  
15  
16

## 17 18 19 **Research question/objective:** 20

21  
22 We framed the review question for this systematic review using the ‘Population and Clinical  
23 Areas, Interventions, Comparators, Attributes of CPGs and Recommendation characteristics’  
24 (PICAR) elements[17]:  
25

26 What is the methodological quality of clinical practice guidelines containing  
27 recommendations for perioperative care in the adult population for the general surgical  
28 setting?  
29  
30

## 31 **METHODS AND ANALYSIS** 32

### 33 **Eligibility criteria** 34

#### 35 **Population and clinical indications** 36

37 We will include clinical practice guidelines for general perioperative care in the adult  
38 population (specific age defined by the CPGs, e.g., typically 16 or 18). We will exclude CPGs  
39 targeting particular populations or conditions (e.g., only gynecologic patients, to prevent  
40 dementia, head and neck cancer, opioid-naïve patients).  
41  
42

#### 43 **Intervention and Comparators** 44

45 We will aim to identify CPGs in the general area of perioperative care for non-specialized  
46 surgeries (not specific for any given type of surgery). The CPG should cover a broad  
47 spectrum of questions for pre-, intra-, and postoperative care, such as assessing the risks of  
48 surgeries, prevention of adverse events, pain management, transfusion management, antibiotic  
49 prophylaxis, maintenance of normothermia, fluid and intake management, advice and mental  
50 preparation of patients, any supplements needed, anticoagulant therapy, control during  
51 surgery, and more, and apply to any surgical setting. We will include a CPG if its scope  
52 covers at least 3 of these or similar areas. We will exclude CPGs targeting only one type of  
53 clinical specialist, disease, surgery, or setting (e.g., the role of neuroimaging, for total hip  
54 replacement only).  
55  
56

#### 57 **Attributes of eligible CPGs** 58

59 We will include any self-identified CPGs, expert guidance, position papers, guidance  
60 documents, and consensus statements published in the last five years by experts in the field or

1  
2  
3 international organizations on the given topic and population, that provide guidance or  
4 recommendations in the full text with no geographical, or language limitation. We will  
5 include only the latest version of the CPG. Excluded will be CPGs with unavailable full text  
6 (we will record and report exclusions).  
7

#### 8 Recommendation characteristics

9 The CPG should contain recommendations and methods of their development, i.e., we will  
10 exclude documents that self-proclaim as guidelines in which it is not clear which parts of the  
11 text are recommendations or how any of the provided statements were developed. Excluded  
12 will be papers containing only good practice statements.[18] Good practice statements, as  
13 opposed to recommendations, do not depict certainty of evidence or strength of  
14 recommendation and do not follow the rigorous methodology typical for recommendations.  
15 However, sometimes the GDG finds a statement needs to be issued for various reasons, but to  
16 search for evidence would be a waste of the group's time. Guideline authors are discouraged  
17 from issuing good practice statements.[19]  
18  
19  
20  
21

#### 22 Patient and Public Involvement

23 No patients will be involved in this review.  
24

#### 25 Types of resources and search strategy

26 The databases and guideline repositories to be searched include MEDLINE (Ovid), Embase  
27 (Ovid), DynaMed, the GIN international guideline library and registry of guidelines in  
28 development, BIGG international database of GRADE guidelines or ECRI Guideline Trust.  
29 Sources of unpublished documents and grey literature to be searched include websites of  
30 guidelines developers as National Institute for Clinical Evidence (NICE), Scottish  
31 Intercollegiate Guidelines Network (SIGN), Arbeitsgemeinschaft der Wissenschaftlichen  
32 Medizinischen Fachgesellschaften (AWMF), KCE Belgian Health Care Knowledge Centre,  
33 Haute Autorité de Santé (HAS), Institute for Clinical Systems Improvement (ISCI); or  
34 websites of other governmental or non-governmental organizations and medical  
35 societies/associations.  
36  
37  
38  
39  
40  
41

42 The search strategy will comprise of the following keywords and related terms: (pre-  
43 operative\* OR preoperative\* OR pre-surg\* OR presurg\* OR perioperative\* OR peri-  
44 operative\* OR intraoperative\* OR intra-operative\* OR intrasurg\* OR intra-surg\* OR  
45 peroperative\* OR per-operative\* OR postoperative\* or post-operative\* or post-surg\* or  
46 postsurg\*) AND (care\* OR caring OR treat\* OR nurs\* OR monitor\* OR recover\* OR  
47 medicine). Corresponding MeSH or Emtree terms will also be used when applicable.  
48  
49

50 We will import all identified CPGs into EndNote X9.2, any duplicates removed,  
51 titles/abstracts, and then full texts screened by two independent reviewers against the  
52 eligibility criteria. We will present search results in a PRISMA flowchart.[20]  
53  
54

#### 55 Data extraction

56 At least two independent reviewers will assess all CPGs, and extract data independently. If  
57 needed, we will contact guideline developers to clarify any uncertainty. When appraising and  
58  
59  
60

1  
2  
3 extracting data from CPGs written in languages other than English, we will ask experienced  
4 reviewers who are fluent in the given language from acquaintances and affiliated centers  
5 around the world or use paid translation services. The data to be extracted will include:  
6

- 7 • Guideline field and scope
- 8 • Year of publication
- 9 • Publishing region
- 10 • The version of the guideline
- 11 • Guideline language
- 12 • Developing organization
- 13 • System of rating evidence used in the guideline

## 14 **Quality assessment**

15  
16 We will assess all eligible CPGs using the complete AGREE II tool to determine the quality  
17 of the guideline development process. Two reviewers will independently assess the CPGs  
18 using the AGREE II instrument and discuss any conflicts with a third senior reviewer. Then,  
19 they will have the opportunity to alter their scoring, if necessary. All review authors are  
20 trained in using AGREE II instrument. The junior methodologists will be supervised as  
21 needed.  
22

23  
24 AGREE II is a 23-item instrument divided into six domains: scope and purpose, stakeholder  
25 involvement, the rigor of development, clarity of presentation, applicability, and editorial  
26 independence. We will use the instrument to appraise each identified CPG and score each  
27 item using a 7-point Likert scale, ranging from strongly disagree (1) to strongly agree (7). In  
28 addition, an overall assessment score will be given to each CPG.  
29

## 30 **Data analysis and presentation**

31  
32 The extracted data will be analyzed and summarized in tabular and narrative form. We will  
33 provide a table with the characteristics of the identified relevant CPGs and the system used for  
34 grading the evidence and recommendations. We will narratively summarize the features of the  
35 grading systems used, the rationale behind them, and how they may have influenced the  
36 overall quality of the respective CPGs.  
37

38  
39 We will report and analyze the rigor of development as depicted by the scores of the AGREE  
40 II tool, specifically, the sums of scores of each item for each of the six domains from each  
41 reviewer, and the percentage of the total scaled from the number. We will use the same  
42 approach to assess the overall score.  
43

44  
45 We will determine the guideline quality based on the scaled domain scores. We will calculate  
46 the inter-rater reliability (via the intraclass correlation coefficient (ICC)) for each domain to  
47 determine the reviewer agreement.  
48

49  
50 The planned start date of the review is January 2022, and we aim to finish by the end of 2022.  
51 We will report the results of this systematic review using the Preferred Reporting Items for  
52 Systematic Reviews and Meta-Analysis statement.[20] We will report and explain any  
53 changes in the methods described in this protocol. We used the PRISMA-P checklist when  
54  
55  
56  
57  
58  
59  
60

1  
2  
3 writing our report.[21] We fully intend to publish all results of the proposed systematic review  
4 in a scholarly open-access journal.  
5  
6

## 7 REFERENCES

- 8  
9  
10 1 Murray CJ, Vos T, Lozano R, et al. disability adjusted life years (DALYs) for 291 diseases and  
11 injuries in 21 regions, 1990–2010: a systematic analysis for the global burden of disease study  
12 2010. *Lancet* 2012;380:2197–2223. doi:10.1016/S0140-6736(12)61689-4  
13 2 Gobbo M, Saldaña R, Rodríguez M, et al. Patients' Experience and Needs During Perioperative  
14 Care: A Focus Group Study. *Patient Prefer Adherence* 2020;14:891–902.  
15 doi:10.2147/PPA.S252670  
16 3 Meara JG, Leather AJ, Hagander L, et al. “Global Surgery 2030: evidence and solutions for  
17 achieving health, welfare, and economic development.” *Int J Obstet Anesth* 2016;25:75–8.  
18 doi:10.1016/j.ijoa.2015.09.006  
19 4 Bengoa R. Transforming health care: an approach to system-wide implementation. *Int J Integr*  
20 *Care* 2013;13:e039. doi:10.5334/ijic.1206  
21 5 Davis Y, Perham M, Hurd AM, et al. Patient and family member needs during the perioperative  
22 period. *J Perianesth Nurs* 2014;29:119–128. doi:10.1016/j.jopan.2013.05.013  
23 6 Engelman DT, Ben Ali W, Williams JB. et al. Guidelines for Perioperative Care in Cardiac  
24 Surgery: Enhanced Recovery After Surgery Society Recommendations. *JAMA Surg*  
25 2019;154:755–766. doi:10.1001/jamasurg.2019.1153  
26 7 Brouwers MC, Kho ME, Browman GP, et al. AGREE II: advancing guideline development,  
27 reporting and evaluation in health care. *CMAJ* 2010;182:E839–E842. doi:10.1503/cmaj.090449  
28 8 Dans AL, Dans LF. Appraising a tool for guideline appraisal (the AGREE II instrument). *J Clin*  
29 *Epidemiol* 2010;63:P1281-1282. doi:10.1016/j.jclinepi.2010.06.005  
30 9 Schünemann JH, Wiercioch W, Etzeandia I, et al. Guidelines 2.0: systematic development of a  
31 comprehensive checklist for a successful guideline enterprise. *CMAJ* 2014;186:E123–E142.  
32 doi:10.1503/cmaj.131237  
33 10 Schünemann H, Brozek J, Guyatt G, et al. GRADE handbook for grading quality of evidence and  
34 strength of recommendations. The GRADE Working Group; 2013. Available online  
35 <https://gdt.gradepro.org/app/handbook/handbook.html> (accessed on 12 April 2021).  
36 11 The AGREE Trust [online]. AGREE History. Available online: [https://www.agreetrust.org/about-](https://www.agreetrust.org/about-the-agree-enterprise/agree-history/)  
37 [the-agree-enterprise/agree-history/](https://www.agreetrust.org/about-the-agree-enterprise/agree-history/) (accessed on 22 October 2021).  
38 12 Brouwers MC, Kho ME, Browman GP, et al. on behalf of the AGREE Next Steps Consortium.  
39 Development of the AGREE II, part 1: performance, usefulness and areas for improvement.  
40 *CMAJ* 2010;182(10):1045-52.  
41 13 Brouwers MC, Kho ME, Browman GP, et al. on behalf of the AGREE Next Steps Consortium.  
42 Development of the AGREE II, part 2: assessment of validity of items and tools to support  
43 application. *CMAJ* 2010;182(10):E472-478.  
44 14 Brouwers MC, Florez ID, McNair SA, et al. Clinical practice guidelines: tools to support high  
45 quality patient care. *Semin Nucl Med* 2019;00:1-8.  
46 15 Brouwers MC, Kerkvliet K, Spithoff K, on behalf of the AGREE Next Steps Consortium. The  
47 AGREE Reporting Checklist: a tool to improve reporting of clinical practice guidelines. *BMJ*  
48 2016;352:i1152.  
49 16 KDP [online]. National methodology of CPG development. Praha: ÚZIS ČR, 2020. Available  
50 online: <https://kdp.uzis.cz/index-en.php?pg=methodology> (accessed on 12 April 2021).  
51 17 Johnston A, Kelly SE, Hsieh SC, et al. Systematic reviews of clinical practice guidelines: a  
52 methodological guide. *J Clin Epidemiol* 2019;108:64–76. doi:10.1016/j.jclinepi.2018.11.030  
53 18 Guyatt GH, Schünemann HJ, Djulbegovic B, et al. Guideline panels should not GRADE good  
54 practice statements. *J Clin Epidemiol* 2015;68:597–600. doi:10.1016/j.jclinepi.2014.12.011  
55  
56  
57  
58  
59  
60



- 1  
2  
3 19 Guyatt, GH. et al. Guideline panels should seldom make good practice statements: guidance from  
4 the GRADE Working Group. *J Clin Epidemiol* 2016;80:3-7. doi:10.1016/j.jclinepi.2016.07.006  
5  
6 20 Page MJ, McKenzie JE, Bossuyt PM, et al. The PRISMA 2020 statement: an updated guideline  
7 for reporting systematic reviews. *BMJ* 2021;372:n71. doi:10.1136/bmj.n71  
8  
9 21 Moher D, Shamseer L, Clarke M, et al. Preferred Reporting Items for Systematic Review and  
10 Meta-Analysis Protocols (PRISMA-P) 2015 statement. *Syst Rev* 2015;4(1):1.  
11  
12  
13

## 14 Footnotes

15  
16 **Contributions:** Conceptualization, MK and LK; Methodology, MK, LK, SS, TN; Validation,  
17 MK; Writing – Original Draft Preparation, LK, PB, JB; Writing – Review & Editing, PB, JB,  
18 TN, SS, MK, JK; Supervision, MK; Funding Acquisition, LK; Search strategy, SS.  
19

20  
21 **Competing interests:** The authors declare no financial conflict of interest. JK is a director of  
22 Center of Evidence-Based Education & Arts Therapies, Faculty of Education, Palacky  
23 University, MK and LK are director and acting deputy director of the Czech National Centre  
24 for Evidence-Based Healthcare and Knowledge Translation. LK, MK (head methodologist),  
25 PB, JB, SS and TN are involved in a Czech national project for the development of clinical  
26 practice guidelines as methodologists.  
27

28  
29 **Funding:** This work was funded from project: Methodological and practical aspects of the  
30 development of guidelines and rapid guidelines in public health (MUNI/IGA/1068/2020). The  
31 funding agency did not influence any aspect of this work.  
32

33 **Patient consent for publication:** Not required.  
34

35  
36 **Provenance and peer review:** Not commissioned; externally peer reviewed.  
37  
38  
39  
40  
41  
42  
43  
44  
45  
46  
47  
48  
49  
50  
51  
52  
53  
54  
55  
56  
57  
58  
59  
60

# Reporting checklist for protocol of a systematic review and meta analysis.

Based on the PRISMA-P guidelines.

## Instructions to authors

Complete this checklist by entering the page numbers from your manuscript where readers will find each of the items listed below.

Your article may not currently address all the items on the checklist. Please modify your text to include the missing information. If you are certain that an item does not apply, please write "n/a" and provide a short explanation.

Upload your completed checklist as an extra file when you submit to a journal.

In your methods section, say that you used the PRISMA-Reporting guidelines, and cite them as:

Moher D, Shamseer L, Clarke M, Ghersi D, Liberati A, Petticrew M, Shekelle P, Stewart LA. Preferred Reporting Items for Systematic Review and Meta-Analysis Protocols (PRISMA-P) 2015 statement. *Syst Rev.* 2015;4(1):1.

| Reporting Item      |                     |                                                                                                                                           | Page Number |
|---------------------|---------------------|-------------------------------------------------------------------------------------------------------------------------------------------|-------------|
| <b>Title</b>        |                     |                                                                                                                                           |             |
| Identification      | <a href="#">#1a</a> | Identify the report as a protocol of a systematic review                                                                                  | 1           |
| Update              | <a href="#">#1b</a> | If the protocol is for an update of a previous systematic review, identify as such                                                        | n/a         |
| <b>Registration</b> |                     |                                                                                                                                           |             |
|                     | <a href="#">#2</a>  | If registered, provide the name of the registry (such as PROSPERO) and registration number                                                | n/a         |
| <b>Authors</b>      |                     |                                                                                                                                           |             |
| Contact             | <a href="#">#3a</a> | Provide name, institutional affiliation, e-mail address of all protocol authors; provide physical mailing address of corresponding author | 1           |
| Contribution        | <a href="#">#3b</a> | Describe contributions of protocol authors and identify the guarantor of the review                                                       | 1           |

## Amendments

|  |                    |                                                                                                                                                                                                 |   |
|--|--------------------|-------------------------------------------------------------------------------------------------------------------------------------------------------------------------------------------------|---|
|  | <a href="#">#4</a> | If the protocol represents an amendment of a previously completed or published protocol, identify as such and list changes; otherwise, state plan for documenting important protocol amendments | 6 |
|--|--------------------|-------------------------------------------------------------------------------------------------------------------------------------------------------------------------------------------------|---|

## Support

|                           |                     |                                                                                                      |   |
|---------------------------|---------------------|------------------------------------------------------------------------------------------------------|---|
| Sources                   | <a href="#">#5a</a> | Indicate sources of financial or other support for the review                                        | 7 |
| Sponsor                   | <a href="#">#5b</a> | Provide name for the review funder and / or sponsor                                                  | 7 |
| Role of sponsor or funder | <a href="#">#5c</a> | Describe roles of funder(s), sponsor(s), and / or institution(s), if any, in developing the protocol | 7 |

## Introduction

|            |                    |                                                                                                                                                          |   |
|------------|--------------------|----------------------------------------------------------------------------------------------------------------------------------------------------------|---|
| Rationale  | <a href="#">#6</a> | Describe the rationale for the review in the context of what is already known                                                                            | 2 |
| Objectives | <a href="#">#7</a> | Provide an explicit statement of the question(s) the review will address with reference to participants, interventions, comparators, and outcomes (PICO) | 4 |

## Methods

|                                   |                      |                                                                                                                                                                                                                               |     |
|-----------------------------------|----------------------|-------------------------------------------------------------------------------------------------------------------------------------------------------------------------------------------------------------------------------|-----|
| Eligibility criteria              | <a href="#">#8</a>   | Specify the study characteristics (such as PICO, study design, setting, time frame) and report characteristics (such as years considered, language, publication status) to be used as criteria for eligibility for the review | 4   |
| Information sources               | <a href="#">#9</a>   | Describe all intended information sources (such as electronic databases, contact with study authors, trial registers or other grey literature sources) with planned dates of coverage                                         | 4-5 |
| Search strategy                   | <a href="#">#10</a>  | Present draft of search strategy to be used for at least one electronic database, including planned limits, such that it could be repeated                                                                                    | 5   |
| Study records - data management   | <a href="#">#11a</a> | Describe the mechanism(s) that will be used to manage records and data throughout the review                                                                                                                                  | n/a |
| Study records - selection process | <a href="#">#11b</a> | State the process that will be used for selecting studies (such as two independent reviewers) through each phase of the review (that is, screening, eligibility and inclusion in meta-analysis)                               | 5   |
| Study records - data              | <a href="#">#11c</a> | Describe planned method of extracting data from reports (such as                                                                                                                                                              | 5   |

|    |                    |                      |                                                                           |     |
|----|--------------------|----------------------|---------------------------------------------------------------------------|-----|
| 1  | collection process |                      | piloting forms, done independently, in duplicate), any processes for      |     |
| 2  |                    |                      | obtaining and confirming data from investigators                          |     |
| 3  |                    |                      |                                                                           |     |
| 4  | Data items         | <a href="#">#12</a>  | List and define all variables for which data will be sought (such as      | 5   |
| 5  |                    |                      | PICO items, funding sources), any pre-planned data assumptions and        |     |
| 6  |                    |                      | simplifications                                                           |     |
| 7  |                    |                      |                                                                           |     |
| 8  |                    |                      |                                                                           |     |
| 9  | Outcomes and       | <a href="#">#13</a>  | List and define all outcomes for which data will be sought, including     | n/a |
| 10 | prioritization     |                      | prioritization of main and additional outcomes, with rationale            |     |
| 11 |                    |                      |                                                                           |     |
| 12 |                    |                      |                                                                           |     |
| 13 | Risk of bias in    | <a href="#">#14</a>  | Describe anticipated methods for assessing risk of bias of individual     | 5   |
| 14 | individual studies |                      | studies, including whether this will be done at the outcome or study      |     |
| 15 |                    |                      | level, or both; state how this information will be used in data synthesis |     |
| 16 |                    |                      |                                                                           |     |
| 17 |                    |                      |                                                                           |     |
| 18 | Data synthesis     | <a href="#">#15a</a> | Describe criteria under which study data will be quantitatively           | 5-6 |
| 19 |                    |                      | synthesised                                                               |     |
| 20 |                    |                      |                                                                           |     |
| 21 |                    |                      |                                                                           |     |
| 22 | Data synthesis     | <a href="#">#15b</a> | If data are appropriate for quantitative synthesis, describe planned      | n/a |
| 23 |                    |                      | summary measures, methods of handling data and methods of                 |     |
| 24 |                    |                      | combining data from studies, including any planned exploration of         |     |
| 25 |                    |                      | consistency (such as I <sup>2</sup> , Kendall's $\tau$ )                  |     |
| 26 |                    |                      |                                                                           |     |
| 27 |                    |                      |                                                                           |     |
| 28 |                    |                      |                                                                           |     |
| 29 | Data synthesis     | <a href="#">#15c</a> | Describe any proposed additional analyses (such as sensitivity or         | n/a |
| 30 |                    |                      | subgroup analyses, meta-regression)                                       |     |
| 31 |                    |                      |                                                                           |     |
| 32 |                    |                      |                                                                           |     |
| 33 | Data synthesis     | <a href="#">#15d</a> | If quantitative synthesis is not appropriate, describe the type of        | 6   |
| 34 |                    |                      | summary planned                                                           |     |
| 35 |                    |                      |                                                                           |     |
| 36 |                    |                      |                                                                           |     |
| 37 | Meta-bias(es)      | <a href="#">#16</a>  | Specify any planned assessment of meta-bias(es) (such as publication      | n/a |
| 38 |                    |                      | bias across studies, selective reporting within studies)                  |     |
| 39 |                    |                      |                                                                           |     |
| 40 |                    |                      |                                                                           |     |
| 41 | Confidence in      | <a href="#">#17</a>  | Describe how the strength of the body of evidence will be assessed        | n/a |
| 42 | cumulative         |                      | (such as GRADE)                                                           |     |
| 43 | evidence           |                      |                                                                           |     |
| 44 |                    |                      |                                                                           |     |
| 45 |                    |                      |                                                                           |     |

The PRISMA-P elaboration and explanation paper is distributed under the terms of the Creative Commons Attribution License CC-BY. This checklist was completed on 25. April 2021 using

<https://www.goodreports.org/>, a tool made by the [EQUATOR Network](#) in collaboration with [Penelope.ai](#)

# BMJ Open

BMJ Open is committed to open peer review. As part of this commitment we make the peer review history of every article we publish publicly available.

When an article is published we post the peer reviewers' comments and the authors' responses online. We also post the versions of the paper that were used during peer review. These are the versions that the peer review comments apply to.

The versions of the paper that follow are the versions that were submitted during the peer review process. They are not the versions of record or the final published versions. They should not be cited or distributed as the published version of this manuscript.

BMJ Open is an open access journal and the full, final, typeset and author-corrected version of record of the manuscript is available on our site with no access controls, subscription charges or pay-per-view fees (<http://bmjopen.bmj.com>).

If you have any questions on BMJ Open's open peer review process please email [info.bmjopen@bmj.com](mailto:info.bmjopen@bmj.com)
